# Supplementary material
Source: PubMed Central journal article supplement (PMC7904030)
Supplement: 41415_2021_2656_MOESM1_ESM.pdf [file 41415_2021_2656_MOESM1_ESM.pdf]

**Supplementary Material 1. General questions and demographic data:**

|                    |                                              |                                                                  |
|--------------------|----------------------------------------------|------------------------------------------------------------------|
| Gender             | Male <input type="checkbox"/>                | Female <input type="checkbox"/>                                  |
| Age                |                                              |                                                                  |
| Height (cm)        |                                              |                                                                  |
| Weight (kg)        |                                              |                                                                  |
| Country/ Address   |                                              |                                                                  |
| Level of education |                                              |                                                                  |
| General health     | Very good-excellent <input type="checkbox"/> | Fair-good <input type="checkbox"/> Poor <input type="checkbox"/> |
| Chronic illness    | Yes <input type="checkbox"/>                 | No <input type="checkbox"/>                                      |
| Smoking            | Yes <input type="checkbox"/>                 | No <input type="checkbox"/>                                      |

## Supplementary Material 2. Questions to measure oral hygiene status:

|                                                                              |                                                     |                                                                       |                                                 |                |
|------------------------------------------------------------------------------|-----------------------------------------------------|-----------------------------------------------------------------------|-------------------------------------------------|----------------|
| 1. How many times do you brush your teeth?                                   | No brushing. (0)                                    | Once a day. (1)                                                       | Twice a day or more. (2)                        |                |
| 2. How do you clean your teeth?                                              | Toothbrush, fluoride toothpaste & dental floss. (3) | Toothbrush, fluoride toothpaste. (2)                                  | Toothbrush only. (1)                            |                |
| 3. How often do you change your toothbrush?                                  | Once in 3 months. (2)                               |                                                                       | Once in 6 months or more. (0)                   |                |
| 4. Do you use mouthwashes containing fluoride?                               | Often. (2)                                          | Sometimes. (1)                                                        | Rare or never. (0)                              |                |
| 5. Do you complain of halitosis (bad smell from your mouth)?                 | Often. (0)                                          | Sometimes. (1)                                                        | Rare or never. (2)                              |                |
| 6. Do you complain of bleeding on brushing or gingival bleeding?             | Often. (0)                                          | Sometimes. (1)                                                        | Rare or never. (2)                              |                |
| 7. Do you suffer of teeth sensitivity?                                       | Often. (0)                                          | Sometimes. (1)                                                        | Rare or never. (2)                              |                |
| 8. Do you have toothaches?                                                   | Yes (0)                                             |                                                                       | No (2)                                          |                |
| 9. How often do you eat sugars?                                              | Daily. (0)                                          |                                                                       | Weekly or more. (2)                             |                |
| 10. Do you consume sugar rich drinks?                                        | Often (0)                                           |                                                                       | Rare (2)                                        |                |
| 11. How often do you visit the dental clinic for check-up?                   | Once a year or more often. (2)                      |                                                                       | Once every few years or when there is pain. (0) |                |
| 12. What procedures do you do the most?                                      | Scaling (2)                                         | Restorations (1)                                                      | Extraction (0)                                  |                |
| 13. How often do you get your teeth cleaned by a dentist?                    | Rare or never (0)                                   | Once in a year (1)                                                    | Twice in a year (2)                             |                |
| 14. Are there restorations in your teeth?                                    | No cavities at all (2)                              | 1-2 cavities (1)                                                      | 3 cavities or more (0)                          | Don't know (0) |
| 15. Do you have any unrestored decayed teeth?                                | Yes (0)                                             |                                                                       | No (2)                                          |                |
| 16. Do you have teeth which are mobile?                                      | Yes (0)                                             | No (2)                                                                | Don't know (2)                                  |                |
| 17. State your dental condition?                                             | Contain missing teeth (0)                           | Contain missing teeth restored with fixed or removable prosthesis (1) | Contain no missing teeth (2)                    |                |
| 18. How were your oral hygiene measures during being infected with COVID-19? | Increased. (2)                                      | Decreased. (0)                                                        | The same. (1)                                   |                |

**Supplementary Material 3. Questions to assess the severity of COVID-19 illness:**

|                                                               |                       |                                 |                  |
|---------------------------------------------------------------|-----------------------|---------------------------------|------------------|
| 1. Did you test PCR positive for COVID-19?                    | Yes                   | No                              |                  |
| 2. Did you complain of fever?                                 | Yes                   | No                              |                  |
| 3. Did you complain of cough?                                 | Yes                   | No                              |                  |
| 4. Did you complain of sore throat?                           | Yes                   | No                              |                  |
| 5. Did you complain of malaise?                               | Yes                   | No                              |                  |
| 6. Did you complain of headache?                              | Yes                   | No                              |                  |
| 7. Did you complain of diarrhea?                              | Yes                   | No                              |                  |
| 8. Did you complain of loss of taste &/ smell sensation?      |                       |                                 |                  |
| 9. Did you complain of muscle pain?                           | Yes                   | No                              |                  |
| 10. Did you experience dyspnea or shortness of breath?        | Yes                   | No                              | Not sure         |
| 11. Did you do chest X-ray or CT chest?                       | Yes                   | No                              |                  |
| 12. Did your chest X-ray or CT chest showed pneumonia?        | Yes                   | No                              | Don't know       |
| 13. If your symptoms deteriorated, when that happened?        | During the first week | During the second week or after | No deterioration |
| 14. When your symptoms started to disappear?                  | After a week or less  | After 1-2 weeks                 | other            |
| 15. When you felt totally free of symptoms (fully recovered)? | 2 weeks               | 4 weeks                         | 6 weeks          |
| 16. Did u need hospitalization?                               | Yes                   | No                              |                  |
| 17. Did you experience high grade fever >39?                  | Yes                   | No                              |                  |
| 18. Did you experience severe dyspnea with cyanosis?          | Yes                   | No                              | Not sure         |
| 19. Did you experience chest pain?                            | Yes                   | No                              |                  |
| 20. Did you experience increase in respiratory rate?          | Yes                   | No                              | Not sure         |
| 21. Did you experience increase in heart rate?                | Yes                   | No                              | Not sure         |
| 22. Did you experience decrease in blood pressure?            | Yes                   | No                              | Not sure         |
| 23. Did your condition required entering intensive care unit? | Yes                   | No                              |                  |
| 24. Did your condition required a ventilator?                 | Yes                   | No                              |                  |
| 25. CRP values during the first week of illness               |                       |                                 |                  |

**Supplementary Material 4.** Demographic data of the included participants with MEAN ± STDV of their age and BMI:

|                  |                                           | N   | %    |
|------------------|-------------------------------------------|-----|------|
| <b>Gender</b>    | Male                                      | 104 | 33.8 |
|                  | Female                                    | 204 | 66.2 |
| <b>Education</b> | High (Bachelor's, Master's & PhD degrees) | 268 | 87   |
|                  | Low (high school or below)                | 40  | 13   |
| <b>Address</b>   | Cairo                                     | 262 | 85   |
|                  | Another Egyptian governorate              | 46  | 15   |
| Age<br>Mean ±SD  | 34.98±8.08                                |     |      |
| BMI<br>Mean ±SD  | 27.35±4.25                                |     |      |

**Supplementary Material 5.** Descriptive statistics for general health of the included participants corresponding to COVID-19 severity with insignificant difference as p value = 0.2 (the MEAN ± STDV of their age and BMI were clarified):

|                                    |                 |        | COVID Severity |       | P Value |
|------------------------------------|-----------------|--------|----------------|-------|---------|
|                                    |                 |        | Serious        | Mild  |         |
| <b>general health description"</b> | Poor            | N      | 2              | 8     | 0.2     |
|                                    |                 | %      | 2.5%           | 3.5%  |         |
|                                    | Fair –good      | N      | 68             | 162   |         |
|                                    |                 | %      | 85.0%          | 71.1% |         |
|                                    | Good –excellent | N      | 10             | 58    |         |
|                                    |                 | %      | 12.5%          | 25.4% |         |
| <b>Age</b>                         | Mean ±SD        | 37±8.5 | 34.28±7.8      | 0.08  |         |
| <b>BMI</b>                         | Mean ±SD        | 27.8±4 | 27.18±4.3      | 0.4   |         |
